# Supplementary material
Source: PubMed Central journal article supplement (PMC4018861)
Supplement: AEM.00362-14_zam999105379so1.pdf [file AEM.00362-14_zam999105379so1.pdf]

**Figure S1.** Participants involved in the trial from the assessment for eligibility through follow-up. T-CD, symptom-free celiac patients; HC, healthy children.

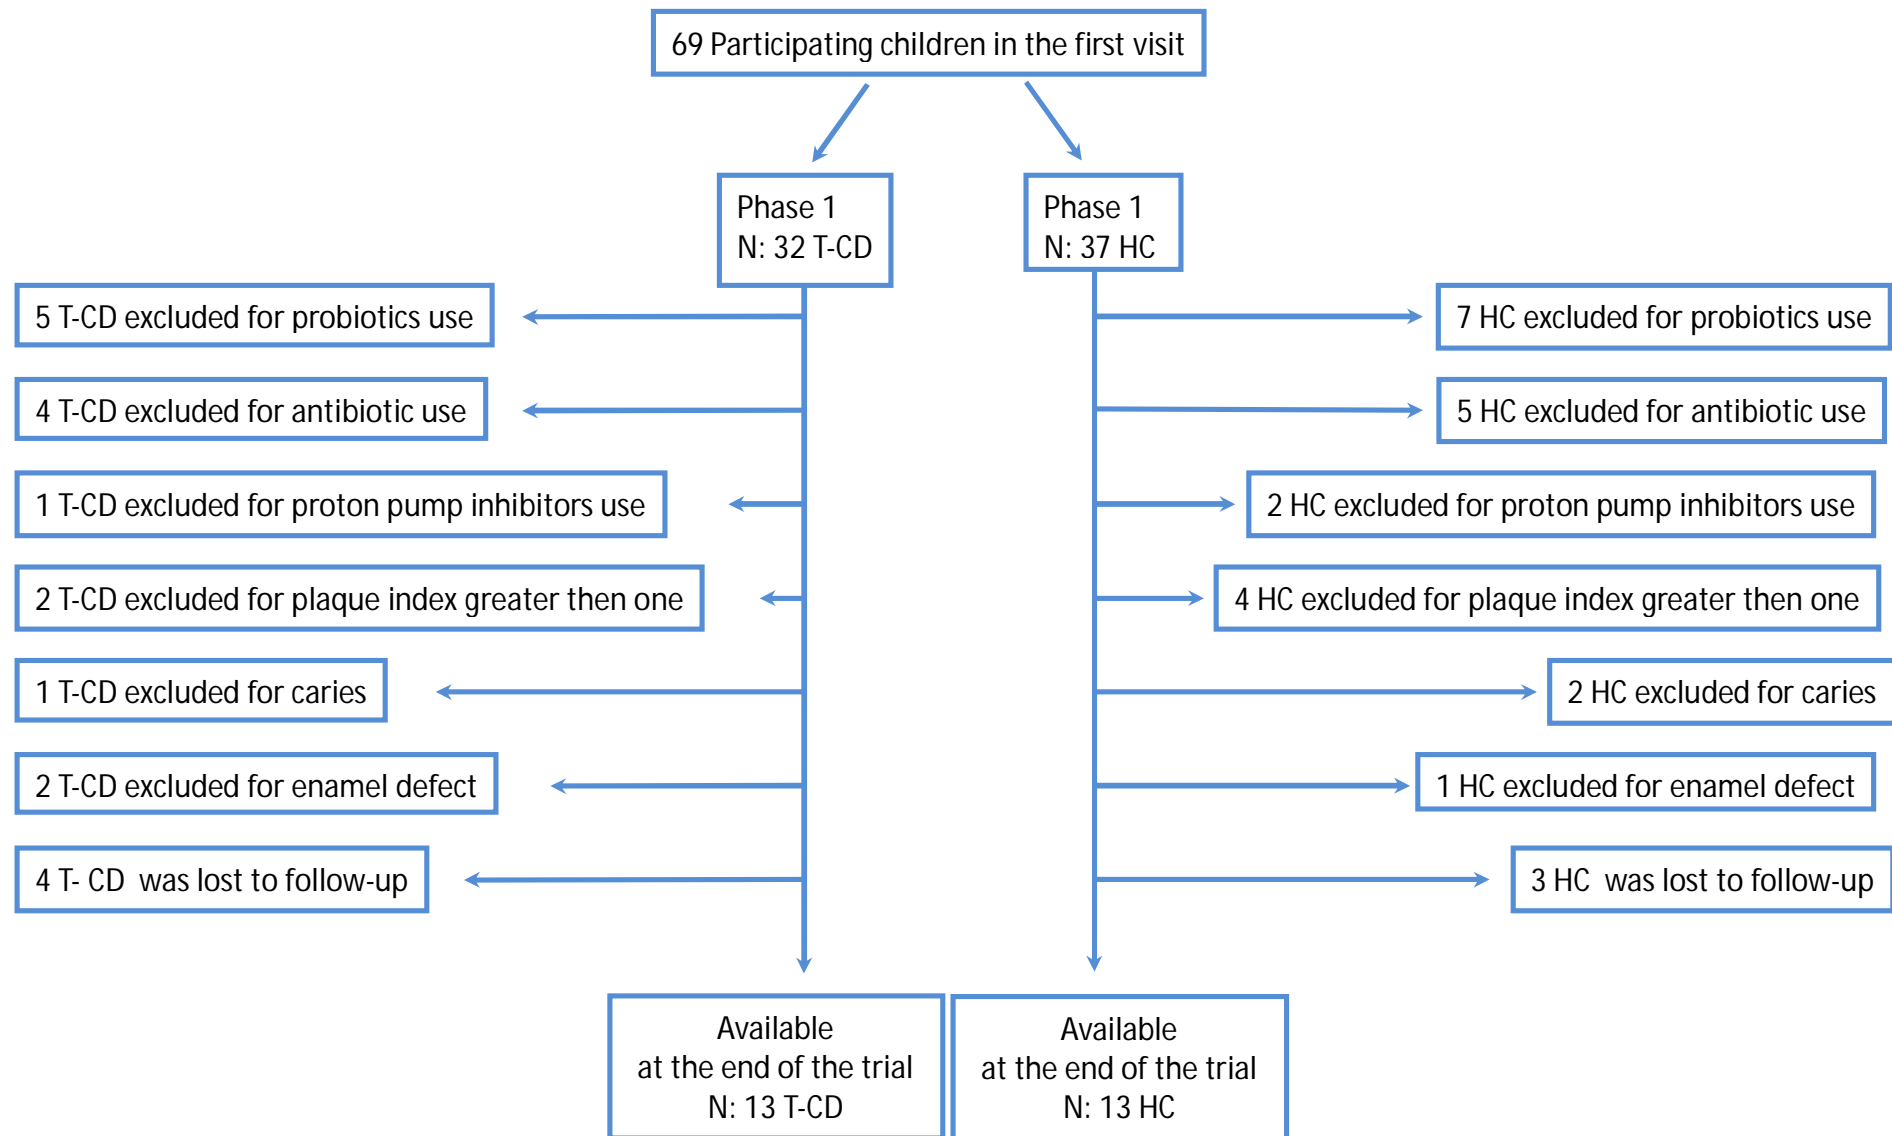

**Table S1.** Relative proportions of predominant bacterial taxa which were found in salivary samples of children under gluten-free diet (T-CD) and healthy controls (HC).

| Phylum     | Family            | Specie                                | Avg (%)<br>T-CD          | Avg (%)<br>HC | p-Val<br>T-CD vs HC |       |
|------------|-------------------|---------------------------------------|--------------------------|---------------|---------------------|-------|
| Firmicutes | Aerococcaceae     | <i>Abiotrophia defectiva</i>          | 0.325                    | 0.146         | 0.201               |       |
|            | Carnobacteriaceae | <i>Granulicatella adiacens</i>        | 2.550                    | 4.254         | 0.014               |       |
|            | Carnobacteriaceae | <i>Granulicatella elegans</i>         | 0.733                    | 0.238         | 0.170               |       |
|            | Gemellaceae       | <i>Gemella</i> sp.                    | 0.400                    | 0.162         | 0.025               |       |
|            |                   | <i>Gemella sanguinis</i>              | 0.317                    | 0.408         | 0.367               |       |
|            | Streptococcaceae  | <i>Streptococcus</i> sp.              | 12.367                   | 11.769        | 0.717               |       |
|            |                   | <i>Streptococcus anginosus</i>        | 0.008                    | 0.023         | 0.336               |       |
|            |                   | <i>Streptococcus gordonii</i>         | 0.033                    | 0.000         | 0.077               |       |
|            |                   | <i>Streptococcus infantis</i>         | 0.183                    | 0.215         | 0.611               |       |
|            |                   | <i>Streptococcus mutans</i>           | 0.000                    | 0.062         | 0.088               |       |
|            |                   | <i>Streptococcus pneumoniae</i>       | 0.417                    | 0.346         | 0.551               |       |
|            |                   | <i>Streptococcus pseudopneumoniae</i> | 0.042                    | 0.085         | 0.057               |       |
|            |                   | <i>Streptococcus sanguinis</i>        | 0.142                    | 0.023         | 0.042               |       |
|            |                   | <i>Streptococcus thermophilus</i>     | 2.650                    | 6.331         | 0.018               |       |
|            |                   | ClostridialesFamilyXI.IncertaeSedis   | <i>Parvimonas micra</i>  | 0.492         | 0.200               | 0.190 |
|            |                   |                                       | <i>Eubacterium</i> sp.   | 0.233         | 0.215               | 0.732 |
|            |                   |                                       | <i>Mogibacterium</i> sp. | 0.217         | 0.446               | 0.035 |
|            |                   | Eubacteriaceae                        | <i>Eubacterium yurii</i> | 0.033         | 0.000               | 0.077 |
|            |                   | Lachnospiraceae                       | <i>Catonella</i> sp.     | 0.042         | 0.015               | 0.233 |
|            |                   |                                       | <i>Moryella</i> sp.      | 0.250         | 0.138               | 0.287 |
|            |                   |                                       | <i>Oribacterium</i> sp.  | 0.292         | 0.269               | 0.774 |
|            |                   |                                       | Other                    | 0.658         | 0.285               | 0.044 |
|            |                   | Peptostreptococcaceae                 | <i>Filifactor</i> sp.    | 0.025         | 0.000               | 0.160 |
|            |                   | <i>Peptostreptococcus</i> sp.         | 0.475                    | 0.454         | 0.907               |       |
|            | Veillonellaceae   | <i>Dialister invisus</i>              | 0.008                    | 0.008         | 0.955               |       |
|            |                   | <i>Selenomonas</i> sp.                | 0.142                    | 0.438         | 0.047               |       |
|            |                   | <i>Selenomonas sputigena</i>          | 0.000                    | 0.038         | 0.140               |       |
|            |                   | <i>Veillonella</i> sp.                | 4.983                    | 4.462         | 0.575               |       |

|                |                      |                                       |        |        |       |
|----------------|----------------------|---------------------------------------|--------|--------|-------|
|                |                      | <i>Veillonella parvula</i>            | 0.275  | 0.562  | 0.002 |
| Firmicutes     | Bacilli              | Other                                 | 0.092  | 0.185  | 0.035 |
| Bacteroidetes  | Porphyromonadaceae   | <i>Porphyromonas</i> sp.              | 12.792 | 8.292  | 0.022 |
|                |                      | <i>Porphyromonas endodontalis</i>     | 0.092  | 0.015  | 0.050 |
|                |                      | <i>Porphyromonas gingivalis</i>       | 0.025  | 0.000  | 0.308 |
|                |                      | <i>Tannerella</i> sp.                 | 0.117  | 0.100  | 0.784 |
|                |                      | <i>Tannerella forsythia</i>           | 0.008  | 0.008  | 0.955 |
|                | Prevotellaceae       | <i>Prevotella</i>                     | 2.283  | 1.585  | 0.191 |
|                |                      | <i>Prevotella intermedia</i>          | 0.017  | 0.000  | 0.308 |
|                |                      | <i>Prevotella melaninogenica</i>      | 14.900 | 12.585 | 0.226 |
|                |                      | <i>Prevotella nanceiensis</i>         | 1.225  | 0.654  | 0.049 |
|                |                      | <i>Prevotella nigrescens</i>          | 0.008  | 0.031  | 0.271 |
|                |                      | <i>Prevotella oris</i>                | 0.017  | 0.054  | 0.056 |
|                |                      | <i>Prevotella oulorum</i>             | 0.108  | 0.069  | 0.441 |
|                |                      | <i>Prevotella pallens</i>             | 1.850  | 2.231  | 0.566 |
|                |                      | <i>Prevotella tanneriae</i>           | 0.383  | 0.177  | 0.359 |
|                |                      | <i>Prevotella veroralis</i>           | 2.442  | 3.500  | 0.450 |
|                | Flavobacteriaceae    | <i>Capnocytophaga</i> sp.             | 0.508  | 0.492  | 0.944 |
|                |                      | <i>Capnocytophaga sputigena</i>       | 0.375  | 0.115  | 0.172 |
| Actinobacteria | Actinomycetaceae     | <i>Actinomyces odontolyticus</i>      | 2.125  | 2.662  | 0.314 |
|                |                      | <i>Actinomyces oris</i>               | 0.008  | 0.115  | 0.001 |
|                |                      | <i>Mobiluncus curtisii</i>            | 0.000  | 0.023  | 0.196 |
|                |                      | <i>Actinomyces</i> sp.                | 0.233  | 0.431  | 0.040 |
|                | Coriobacteriaceae    | <i>Atopobium</i> sp.                  | 0.467  | 1.462  | 0.023 |
|                | Corynebacteriaceae   | <i>Corynebacterium argentoratense</i> | 0.000  | 0.254  | 0.121 |
|                |                      | <i>Corynebacterium durum</i>          | 0.117  | 0.315  | 0.050 |
|                |                      | <i>Corynebacterium matruchotii</i>    | 0.017  | 0.038  | 0.243 |
|                | Micrococcaceae       | <i>Rothia aeria</i>                   | 0.075  | 0.031  | 0.457 |
|                |                      | <i>Rothia mucilaginosa</i>            | 0.358  | 0.123  | 0.050 |
|                | Propionibacteriaceae | <i>Propionibacterium</i> sp.          | 0.000  | 0.008  | 0.347 |
| Proteobacteria | Burkholderiaceae     | <i>Lautropia</i> sp.                  | 0.100  | 0.054  | 0.170 |
|                | Neisseriaceae        | <i>Eikenella corrodens</i>            | 0.008  | 0.031  | 0.271 |
|                |                      | <i>Kingella kingae</i>                | 0.008  | 0.000  | 0.308 |
| Proteobacteria | Neisseriaceae        | <i>Kingella oralis</i>                | 0.008  | 0.031  | 0.271 |

|                |                    |                                   |       |       |       |
|----------------|--------------------|-----------------------------------|-------|-------|-------|
| Proteobacteria | Neisseriaceae      | <i>Neisseria</i> sp.              | 2.725 | 1.800 | 0.290 |
|                | Campylobacteraceae | <i>Campylobacter concisus</i>     | 0.225 | 0.092 | 0.257 |
| Proteobacteria | Campylobacteraceae | <i>Campylobacter rectus</i>       | 0.008 | 0.000 | 0.308 |
|                | Cardiobacteriaceae | <i>Cardiobacterium hominis</i>    | 0.000 | 0.015 | 0.170 |
|                | Moraxellaceae      | <i>Moraxella</i> sp.              | 0.042 | 0.000 | 0.308 |
|                | Pasteurellaceae    | <i>Actinobacillus</i> sp.         | 0.133 | 0.192 | 0.547 |
|                |                    | <i>Aggregatibacter segnis</i>     | 0.008 | 0.000 | 0.308 |
|                |                    | <i>Haemophilus</i> sp.            | 0.000 | 0.015 | 0.347 |
|                |                    | <i>Haemophilus parainfluenzae</i> | 5.283 | 7.685 | 0.152 |
| Fusobacteria   | Fusobacteriaceae   | <i>Fusobacterium</i> sp.          | 1.500 | 1.285 | 0.557 |
|                |                    | <i>Leptotrichia</i> sp.           | 5.125 | 6.469 | 0.333 |
|                |                    | <i>Streptobacillus</i> sp.        | 0.017 | 0.085 | 0.358 |
| SR1            |                    |                                   | 0.842 | 0.154 | 0.050 |

---

**Table S2.** Concentration (ppm) of volatile organic compounds (VOCs) showing significant ( $P<0.05$ ) differences between saliva samples of celiac (T-CD) and healthy (HC) children.

| Chemical class                              | T-CD              |           | HC                |           |
|---------------------------------------------|-------------------|-----------|-------------------|-----------|
|                                             | Median            | Range     | Median            | Range     |
| Alcohols and phenols                        |                   |           |                   |           |
| Propyl alcohol (1-propanol)                 | 0.37 <sup>a</sup> | 0.09-2.44 | 0.24 <sup>b</sup> | 0.06-1.08 |
| 2-Hexanol                                   | 0.01 <sup>b</sup> | 0.00-0.04 | 0.02 <sup>a</sup> | 0.00-0.08 |
| 2-Ethyl-1-hexanol                           | 0.43 <sup>b</sup> | 0.21-1.68 | 1.20 <sup>a</sup> | 0.40-1.44 |
| Ethyl alcohol                               | 0.62 <sup>b</sup> | 0.18-1.67 | 1.21 <sup>a</sup> | 0.02-2.10 |
| 2,5-Bis(1,1-dimethylethyl)-phenol           | 0.11 <sup>b</sup> | 0.03-0.38 | 0.21 <sup>a</sup> | 0.04-0.27 |
| 4-(1,1,3,3-Tertamethylbutyl)-phenol         | 0.54 <sup>b</sup> | 0.24-1.60 | 1.44 <sup>a</sup> | 0.45-3.24 |
| 4-(1,1-Dimethylpropyl)-phenol               | 0.13 <sup>b</sup> | 0.08-0.24 | 0.30 <sup>a</sup> | 0.10-0.42 |
| Phenyl alcohol (Phenol)                     | 0.43 <sup>a</sup> | 0.05-0.83 | 0.19 <sup>b</sup> | 0.03-1.16 |
| 4-Methoxybenzhydrol                         | 0.01 <sup>b</sup> | 0.00-0.03 | 0.02 <sup>a</sup> | 0.01-0.03 |
| Aldehydes                                   |                   |           |                   |           |
| Nonanal                                     | 1.66 <sup>a</sup> | 1.30-4.70 | 0.68 <sup>b</sup> | 0.61-1.34 |
| Octanal                                     | 0.28 <sup>b</sup> | 0.07-0.94 | 0.64 <sup>a</sup> | 0.12-0.85 |
| Esters                                      |                   |           |                   |           |
| Butanoic acid, 2-methyloctyl ester          | 0.00 <sup>b</sup> | 0.00-0.05 | 0.03 <sup>a</sup> | 0.00-0.06 |
| Acetic acid ethyl ester                     | 1.86 <sup>a</sup> | 0.23-2.90 | 0.70 <sup>b</sup> | 0.18-1.43 |
| Aromatic heterocyclic                       |                   |           |                   |           |
| 1(3H)-isobenzofuranone ( $\gamma$ -lactone) | 0.01 <sup>b</sup> | 0.00-0.08 | 0.05 <sup>a</sup> | 0.01-0.07 |
| 2-Pentyl furan                              | 0.42 <sup>a</sup> | 0.16-0.79 | 0.22 <sup>b</sup> | 0.02-9.41 |
| Hydrocarbons                                |                   |           |                   |           |
| 1,2,3-Trimethyl-benzene                     | 0.18 <sup>b</sup> | 0.01-1.95 | 0.45 <sup>a</sup> | 0.30-0.52 |
| 1,3-Bis(1,1-dimethylethyl)-benzene          | 0.23 <sup>a</sup> | 0.14-0.59 | 0.17 <sup>b</sup> | 0.06-0.58 |
| 1-Chloro decane                             | 0.60 <sup>a</sup> | 0.52-1.01 | 0.16 <sup>b</sup> | 0.12-0.44 |
| 1-Methyl-2-(1-methylethyl)-benzene          | 0.04 <sup>b</sup> | 0.00-0.47 | 0.16 <sup>a</sup> | 0.04-2.78 |
| 1-Octadecene                                | 0.26 <sup>b</sup> | 0.03-2.22 | 1.47 <sup>a</sup> | 0.32-2.00 |
| 4-Methyl-1-pentene                          | 0.01 <sup>b</sup> | 0.00-0.05 | 0.02 <sup>a</sup> | 0.00-0.06 |
| Benzene                                     | 0.24 <sup>a</sup> | 0.10-0.25 | 0.13 <sup>b</sup> | 0.00-0.24 |

|                          |                   |           |                   |           |
|--------------------------|-------------------|-----------|-------------------|-----------|
| Benzene (octyloxy)       | 0.01 <sup>b</sup> | 0.00-0.03 | 0.03 <sup>a</sup> | 0.00-0.04 |
| Hexadecane               | 0.00 <sup>b</sup> | 0.00-0.05 | 0.02 <sup>a</sup> | 0.00-0.03 |
| Nonadecane               | 0.00 <sup>b</sup> | 0.00-0.04 | 0.01 <sup>a</sup> | 0.00-0.24 |
| Pentadecane              | 0.01 <sup>b</sup> | 0.00-0.06 | 0.02 <sup>a</sup> | 0.00-0.03 |
| Tetradecane              | 0.19 <sup>a</sup> | 0.06-1.87 | 0.10 <sup>b</sup> | 0.08-1.25 |
| Toluene                  | 0.50 <sup>a</sup> | 0.00-1.00 | 0.25 <sup>b</sup> | 0.10-0.41 |
| Trichloromethane         | 0.22 <sup>a</sup> | 0.00-0.30 | 0.12 <sup>b</sup> | 0.09-0.18 |
| Caryophyllene            | 0.00 <sup>b</sup> | 0.00-0.02 | 0.02 <sup>a</sup> | 0.01-0.04 |
| Menthol                  | 0.01 <sup>b</sup> | 0.00-0.04 | 0.03 <sup>a</sup> | 0.01-0.12 |
| <b>Ketones</b>           |                   |           |                   |           |
| 2,6-Dimethyl-4-heptanone | 0.00 <sup>b</sup> | 0.00-0.23 | 0.15 <sup>a</sup> | 0.00-0.31 |
| 2-Butanone               | 0.11 <sup>a</sup> | 0.00-0.16 | 0.01 <sup>b</sup> | 0.00-0.04 |
| 4-Methyl-2-hexanone      | 0.00 <sup>b</sup> | 0.00-0.05 | 0.03 <sup>a</sup> | 0.01-0.07 |
| 4-Methyl-3-penten-2-one  | 0.30 <sup>b</sup> | 0.16-0.79 | 0.64 <sup>a</sup> | 0.27-1.06 |
| Methyl isobutyl ketone   | 0.03 <sup>b</sup> | 0.00-0.09 | 0.09 <sup>a</sup> | 0.07-0.11 |
| <b>Sulfur compounds</b>  |                   |           |                   |           |
| Carbon disulfide         | 3.88 <sup>a</sup> | 1.83-7.23 | 3.18 <sup>b</sup> | 2.37-4.87 |
| <b>Terpenes</b>          |                   |           |                   |           |
| Caryophyllene            | 0.00 <sup>a</sup> | 0.00-0.02 | 0.02 <sup>b</sup> | 0.01-0.04 |
| Menthol                  | 0.01 <sup>a</sup> | 0.00-0.04 | 0.03 <sup>b</sup> | 0.01-0.12 |
| <b>Thiophenes</b>        |                   |           |                   |           |
| 2-Pentyl-thiophene       | 2.47 <sup>b</sup> | 1.19-9.04 | 6.20 <sup>a</sup> | 2.54-8.08 |
| <b>Ions</b>              |                   |           |                   |           |
| n.d.3 (ion 97)           | 0.53 <sup>b</sup> | 0.23-2.36 | 1.68 <sup>a</sup> | 0.48-2.08 |
| n.d.4 (ion 102)          | 0.49 <sup>b</sup> | 0.25-1.12 | 1.78 <sup>a</sup> | 0.49-2.25 |

Data are the means of three independent experiments (n = 3) for each children. <sup>a-b</sup>Values within a row with different superscript letters are significantly different ( $P < 0.05$ ).
